# Supplementary material for: A novel sodium-ion supercabattery based on vacancy defective Ni–Co–Mn ternary perovskite fluoride electrode materials
Source: Royal Society of Chemistry journal article supplement (doi:10.1039/d1ta02894d), 2021-01-01
Supplement: d1ta02894d1.pdf [file d1ta02894d1.pdf]

## Electronic Supplementary Information

### **A novel sodium-ion supercabattery based on vacancy defective Ni-Co-Mn ternary perovskite fluorides electrode materials**

Tong Yan,<sup>a</sup> Rui Ding,<sup>\*a</sup> Yongfa Huang,<sup>a</sup> Danfeng Ying,<sup>a</sup> Caini Tan,<sup>a</sup> Yuxi Huang,<sup>a</sup> Feng Yang,<sup>a</sup>

Xiujuan Sun,<sup>a</sup> Ping Gao<sup>a</sup> and Enhui Liu<sup>a</sup>

<sup>a</sup>Key Laboratory of Environmentally Friendly Chemistry and Applications of Ministry of Education, College of Chemistry, Xiangtan University, Xiangtan, Hunan 411105, P.R. China

\*E-mails: [drm8122@163.com](mailto:drm8122@163.com); [drm8122@xtu.edu.cn](mailto:drm8122@xtu.edu.cn)

## Table of contents

|                             |                                                                                                                           |      |
|-----------------------------|---------------------------------------------------------------------------------------------------------------------------|------|
| <b>Experimental section</b> | Synthesis of materials, characterizations, electrochemical measurements, and calculations for $C_m$ , $E_m$ , and $P_m$ . | P 4  |
| <b>Fig. S1</b>              | XRD pattern of KMF(244)/rGO sample.                                                                                       | P 6  |
| <b>Fig. S2</b>              | SEM and TEM of KMF(244)/rGO samples.                                                                                      | P 7  |
| <b>Fig. S3</b>              | SEM selected area and EDS of KMF(244)/rGO samples.                                                                        | P 8  |
| <b>Fig. S4</b>              | N <sub>2</sub> sorption isotherms, pore volumes, and pore size distributions of KMF(244)/rGO samples.                     | P 9  |
| <b>Fig. S5</b>              | CV plots for the first three cycles at 0.3 mV s <sup>-1</sup> of KMF/rGO (811-118) electrodes.                            | P 10 |
| <b>Fig. S6</b>              | GCD curves for the first five cycles at 0.02 A g <sup>-1</sup> of KMF/rGO (811-118) electrode.                            | P 11 |
| <b>Fig. S7</b>              | GCD curves at 0.02-2.0 A g <sup>-1</sup> of KMF/rGO (811-118) electrode.                                                  | P 12 |
| <b>Fig. S8</b>              | Rate capability and coulombic efficiency at 0.02-2.0 A g <sup>-1</sup> of KMF/rGO (811-118) electrodes.                   | P 13 |
| <b>Fig. S9</b>              | Cycling behavior at 0.5 A g <sup>-1</sup> of KMF/rGO (811-118) electrode.                                                 | P 14 |
| <b>Fig. S10</b>             | Pseudocapacitive and diffusion-controlled contributions to charge storage in the KMF(244)/rGO electrode.                  | P 15 |
| <b>Fig. S11</b>             | Ex-situ XPS for survey scans, C1s, and O1s in pristine and fully discharged/charged states of the KMF(244)/rGO electrode. | P 16 |
| <b>Fig. S12</b>             | XRD pattern, Specific capacity and GCD curves of rGO.                                                                     | P 17 |
| <b>Fig. S13</b>             | Electrochemical performance of the AC electrode.                                                                          | P 18 |
| <b>Fig. S14</b>             | Electrochemical performance of the NVPOF electrode.                                                                       | P 19 |
| <b>Fig. S15</b>             | Electrochemical performance of the AC/NVPOF electrode.                                                                    | P 20 |
| <b>Fig. S16</b>             | The voltage windows of KMF(244)/rGO//AC SICs, KMF(244)/rGO//NVPOF SIBs, and KMF(244)/rGO//AC/NVPOF SICBs.                 | P 21 |
| <b>Fig. S17</b>             | The performance of KMF(244)/rGO//AC SICs at 0-4.5 V.                                                                      | P 22 |
| <b>Fig. S18</b>             | The performance of KMF(244)/rGO//NVPOF SIBs at 0-4.5 V.                                                                   | P 23 |
| <b>Fig. S19</b>             | The performance of KMF(244)/rGO//AC/NVPOF SICBs at 0-4.5 V.                                                               | P 24 |
| <b>Table S1</b>             | Crystalline parameters for KNiF <sub>3</sub> , KCoF <sub>3</sub> , and KMnF <sub>3</sub> .                                | P 25 |

|                 |                                                                                                                             |      |
|-----------------|-----------------------------------------------------------------------------------------------------------------------------|------|
| <b>Table S2</b> | Charged specific capacity and cycling retention of the KMF/rGO (811-118) electrodes.                                        | P 26 |
| <b>Table S3</b> | Crystalline parameters for the indicated new phases of the fully discharged/charged state XRD patterns.                     | P 27 |
| <b>Table S4</b> | Charged specific capacity and cycling retention of the AC, NVPOF, and AC/NVPOF electrodes.                                  | P 28 |
| <b>Table S5</b> | The design of m+/m. ratios for KMF(244)/rGO//AC SICs, KMF(244)/rGO//NVPOF SIBs, and KMF(244)/rGO//AC/NVPOF SICBs.           | P 29 |
| <b>Table S6</b> | Performance summary of the KMF(244)/rGO//AC SICs, KMF(244)/rGO//NVPOF SIBs, and KMF(244)/rGO//AC/NVPOF SICBs in this study. | P 30 |
| <b>Table S7</b> | A comparison for the performance of the KMF(244)/rGO//AC/NVPOF SICBs in this study with some reported SIBs and SICs.        | P 31 |
| <b>Table S8</b> | Chemicals, reagents, and materials used in this study.                                                                      | P 32 |
| <b>Table S9</b> | The usage amounts of reagents of the KMF/rGO (811-118) samples.                                                             | P 33 |

## Experimental

### Synthesis of materials

The chemicals and reagents used in this study are all of the analytical/guaranteed reagents (AR/GR) and were used without further treatment (**Table S8**). A facile one-pot solvothermal method was applied to synthesize these samples. The synthetic procedure of KMF(244)/rGO (M=Ni, Co, Mn) sample is taken out as an example since the synthetic steps of eight other KMF/rGO samples are all the same except for the usage amounts of nickel, cobalt, and manganese salts, more details of the usage amounts of reagents can be seen in **Table S9**. Firstly, 60 mg graphene oxides (GO) were dispersed in 32 mL solvents of ethylene glycol (EG) with the ultrasonic treatment for 1 h, and then 0.4 mmol  $\text{NiCl}_2 \cdot 6\text{H}_2\text{O}$ , 0.8 mmol  $\text{CoCl}_2 \cdot 6\text{H}_2\text{O}$ , 0.8 mmol  $\text{MnCl}_2 \cdot 4\text{H}_2\text{O}$ , 5 mmol  $\text{KF} \cdot 2\text{H}_2\text{O}$ , and 0.2 g PVP-K30 were further dissolved into the solvents; Secondly, the mixture was magnetically stirred and dispersed thoroughly in an ultrasonic bath at 100 W for 30 min; Thirdly, the mixture was transferred into a 50 mL Teflon-lined stainless steel autoclave, which was heated at 180 °C for 12 h in an electric oven, and then cooled down to room temperature; Next, the yielded precipitates were centrifuged and washed with absolute alcohol for several times; Finally, the precipitates were dried at 90 °C for 12 h to obtain the final product. The synthetic of rGO is the same as the KMF(244)/rGO (M=Ni, Co, Mn) sample except for without adding nickel, cobalt, and manganese salts.

### Characterizations

The phases and crystallinity properties are determined by X-ray diffraction (XRD). The surface chemical compositions and electronic structures are checked by X-ray photoelectron spectra (XPS). The morphology and size of particles are analyzed by scanning electron microscopy (SEM) and transmission electron microscopy (TEM). The crystalline microstructures are resolved by the high-resolution TEM (HRTEM) and selected area electron diffraction (SAED). The element composition and distribution are measured by inductively coupled plasma-optical emission spectrometer (ICP-OES), X-ray energy dispersive spectra (EDS), and mapping. The specific surface area, pore volume, and size distribution are examined by nitrogen isothermal sorption with Brunauer-Emmett-Teller (BET) and Barrett-Joyner-Halenda (BJH) methods. The content of reduced graphene oxide is analyzed by Thermogravimetric analysis (TGA) and differential Thermogravimetric analysis (DTG).

### Electrochemical measurements

The following is the procedure of preparing electrodes: i) Mixing 70 wt.% active materials (as-synthesized KMF/rGO (811-118), rGO or commercial AC, NVPOF, and AC/NVPOF ( $m_{\text{AC}}:m_{\text{NVPOF}}=1:1$ )), 20 wt.% conductive agent of superconductive carbon black and 10 wt.% binders of polyvinylidene fluoride (PVDF) evenly with N-methyl-2-pyrrolidone (NMP)); ii) Casting the mixture onto the current collectors, where Cu foil and carbon-coated Al foil were used for anodes and cathodes respectively; iii) Drying them in a vacuum oven at 110 °C for 12 h; iv) Cutting them into disks with a diameter of 12 mm with the active materials mass loading of about 1.0-3.0  $\text{mg cm}^{-2}$ . In the current work, half-cells were fabricated using the CR-2032 coin cells with active materials as working electrode (WE), a Na plate as both counter and reference electrodes (CE/RE), glass fiber (GF) as the separator, and 0.85 M

NaPF<sub>6</sub> dissolved in the mixed solvents of ethylene carbonate (EC), dimethyl carbonate (DEC) and ethyl methyl carbonate (EMC) (1:1:1 in volume) with 5% fluoroethylene carbonate (FEC) additives (MJS) as the electrolytes. Tests for the different energy storage devices (SICs, SIBs, and SICBs) were conducted via full-cells with certain mass ratios of active materials of anode and cathode (**Table S5**). All cell assemblies were performed in a highly pure Ar-filled dry glovebox (MIKROUNA, O<sub>2</sub> and H<sub>2</sub>O<0.1 ppm), and all tests were carried out at room temperature (about 25 °C) (The more detailed information of the above-mentioned materials, chemicals and reagents can be seen in **Table S8**). The test procedure of KMF/rGO (811-118) anode: we used the same cell to test the specific capacity (rate performance) at 0.02-2-0.02 A g<sup>-1</sup> and cycle performance at 0.5 A g<sup>-1</sup> for 500 cycles (before testing the cycle performance the cell was laid aside for 3 hours) of KMF/rGO (811-118) anode materials. The test procedure of NVPOF, AC and AC/NVPOF cathode half cell and SICs, SIBs and SICBs full cell: firstly, we use one fresh cell to test rate performance, and then we use another fresh cell to test cycle performance. The charge-balance ( $Q_+=Q_-$ ) as shown in equation (1) was used to calculate the mass ratios of active materials of cathode and anode. The specific capacity ( $C_m$ , mAh g<sup>-1</sup>), energy density ( $E_{m,1}$ , Wh kg<sup>-1</sup>) for SICs, energy density ( $E_{m,2}$ , Wh kg<sup>-1</sup>) for SIBs and SICBs, and power density ( $P_m$ , kW kg<sup>-1</sup>) of different energy storage devices were calculated according to the equations (2)-(5).

$$m_+/m_-=Q_{m-}/Q_{m+} \quad (1)$$

$$C_m=Q_m/3.6=It/3.6m \quad (2)$$

$$E_{m,1}=(C_m\Delta V)/2 \quad (3)$$

$$E_{m,2}=\int_0^{C_m} VdC_m \quad (4)$$

$$P_m=3.6E_m/t_d \quad (5)$$

Where  $m$ ,  $Q_m$ ,  $V$ ,  $I$ , and  $t_d$  refer to the mass of active materials (g, for half cells, it means the mass of active materials of anode or cathode; for full-cells, it means the total masses of active materials of anode and cathode), specific charge or discharge quantity (C g<sup>-1</sup>, for the anode, it means the charge quantity; for cathode and full-cells, it refers to the discharge quantity), voltage window (V), current (A) and discharging time (s), respectively.

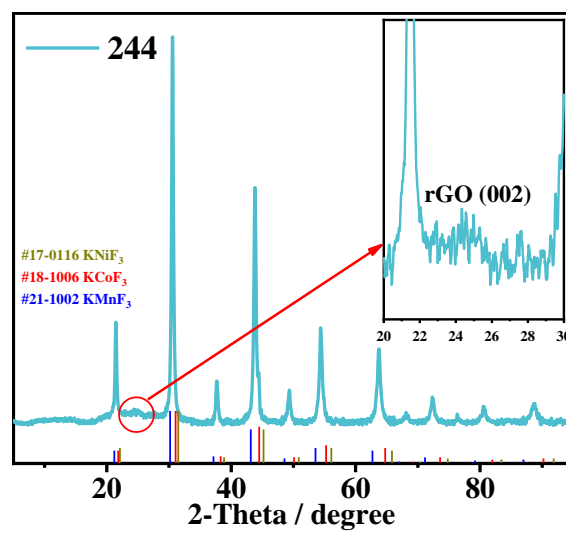

Fig. S1 XRD pattern of KMF(244)/rGO sample.

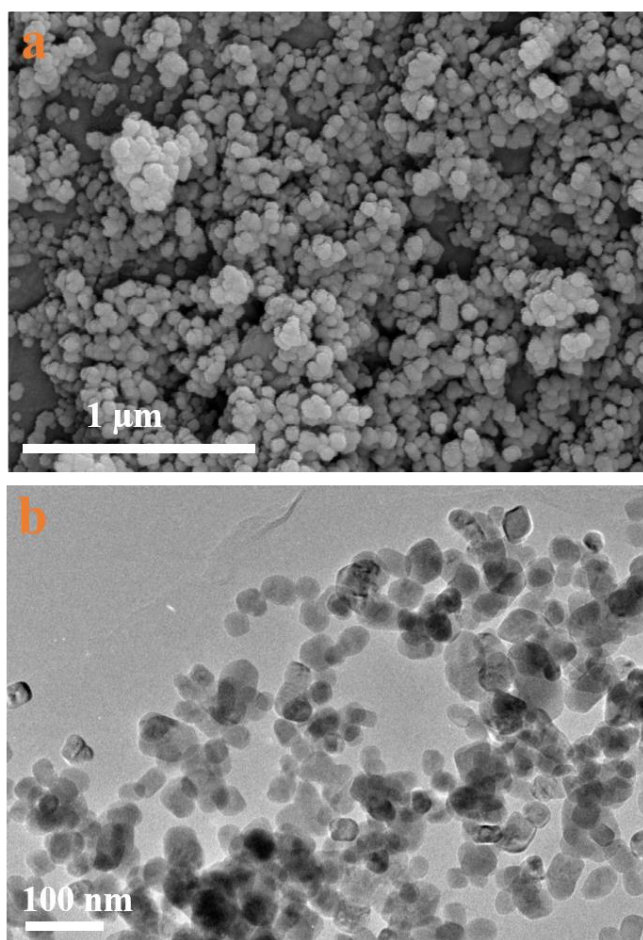

**Fig. S2** SEM (a) and TEM (b) of KMF(244)/rGO samples.

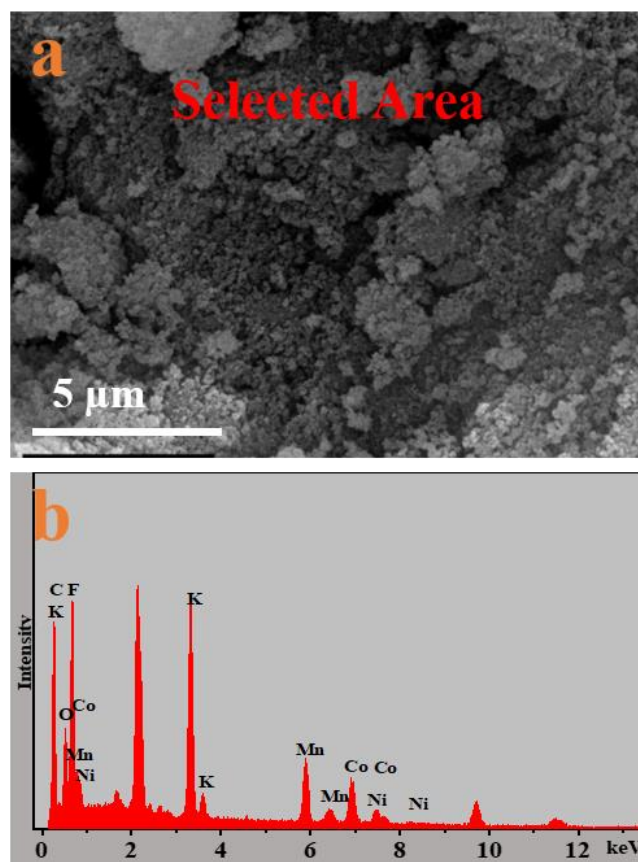

**Fig. S3** SEM selected area (a) and EDS (b) of KMF(244)/rGO samples.



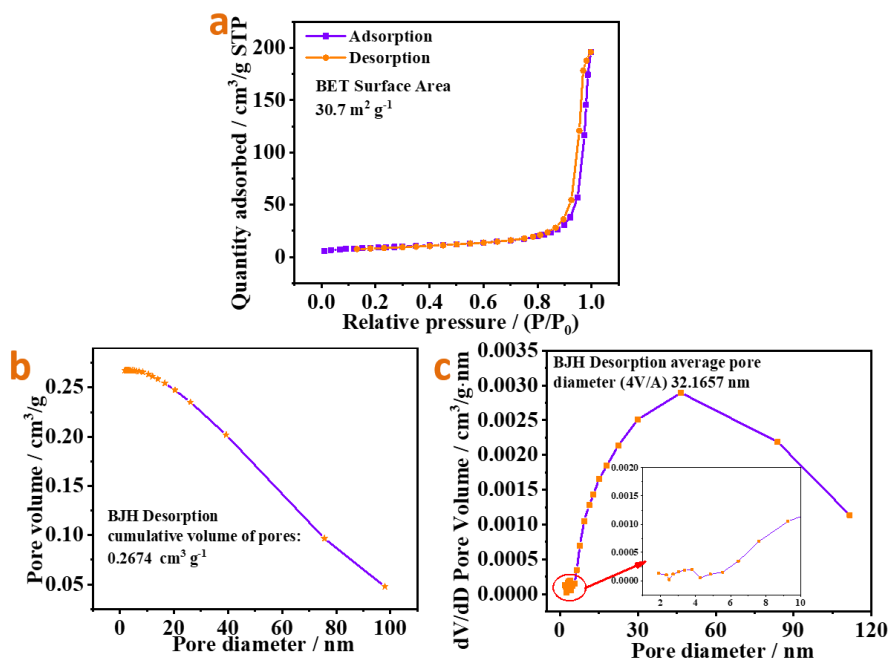

**Fig. S4**  $\text{N}_2$  sorption isotherms (a), pore volumes (b), and pore size distributions (c) of KMF(244)/rGO samples.

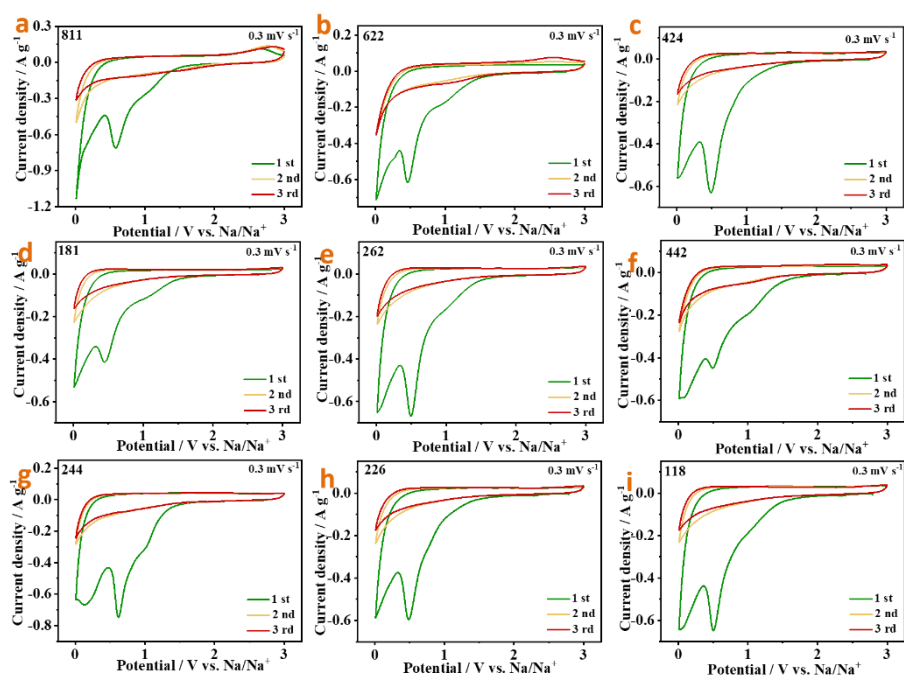

**Fig. S5** CV plots for the first three cycles at  $0.3 \text{ mV s}^{-1}$  of KMF/rGO (811-118) electrodes.

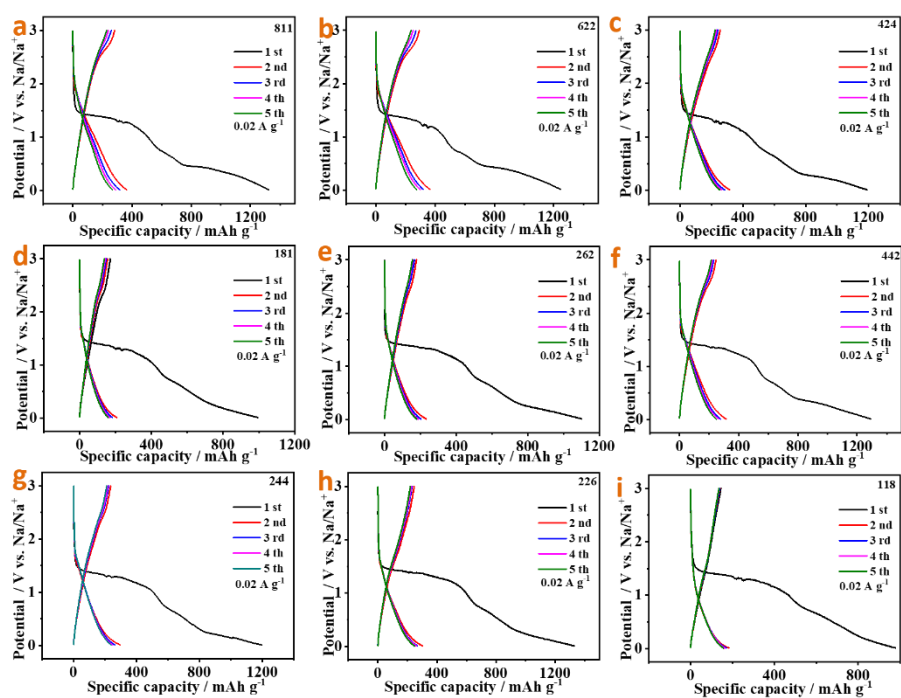

**Fig. S6** GCD curves for the first five cycles at  $0.02 \text{ A g}^{-1}$  of KMF/rGO (811-118) electrode.

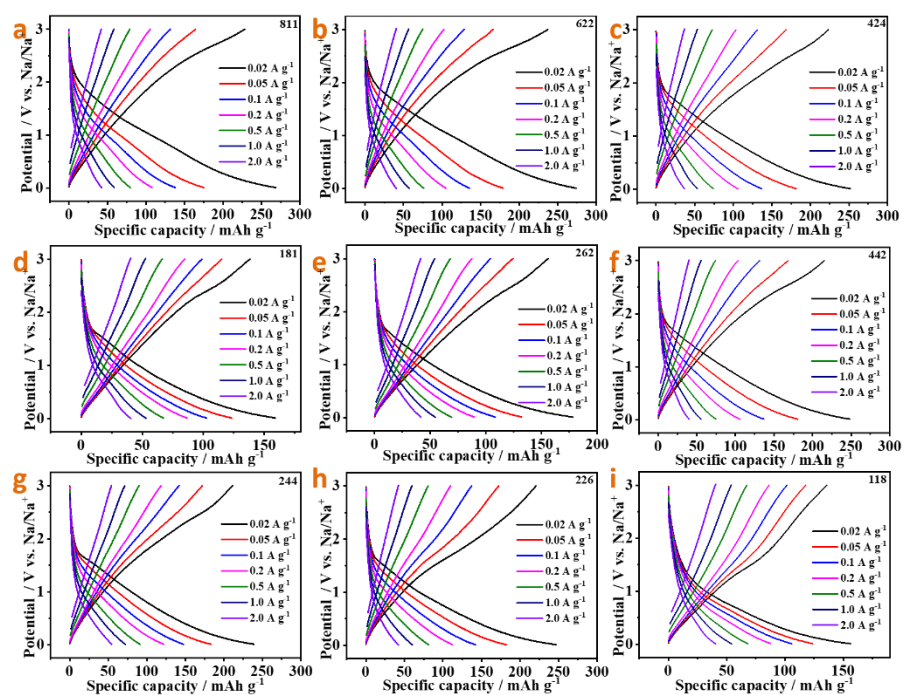

Fig. S7 GCD curves at 0.02-2.0 A g<sup>-1</sup> of KMF/rGO (811-118) electrode.

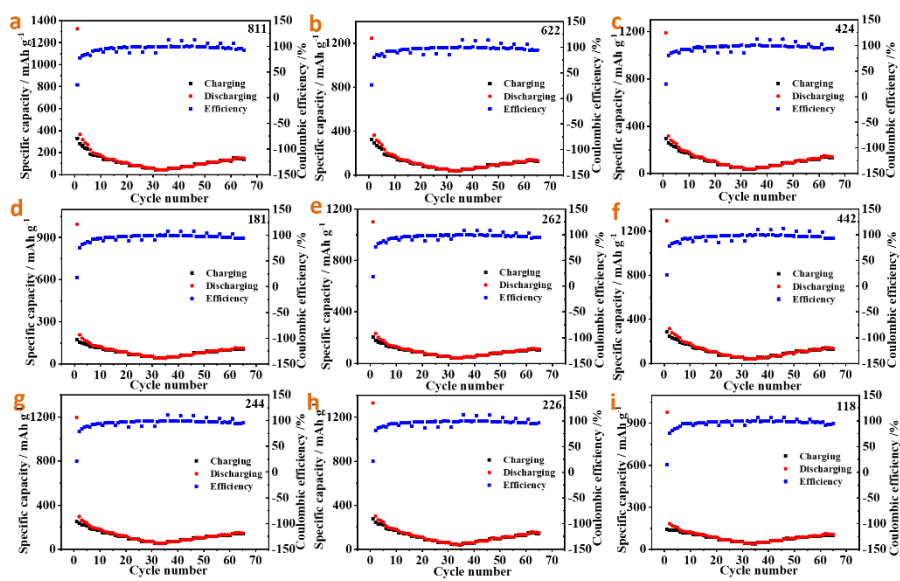

**Fig. S8** Rate capability and coulombic efficiency at 0.02-2.0 A g<sup>-1</sup> of KMF/rGO (811-118) electrodes.

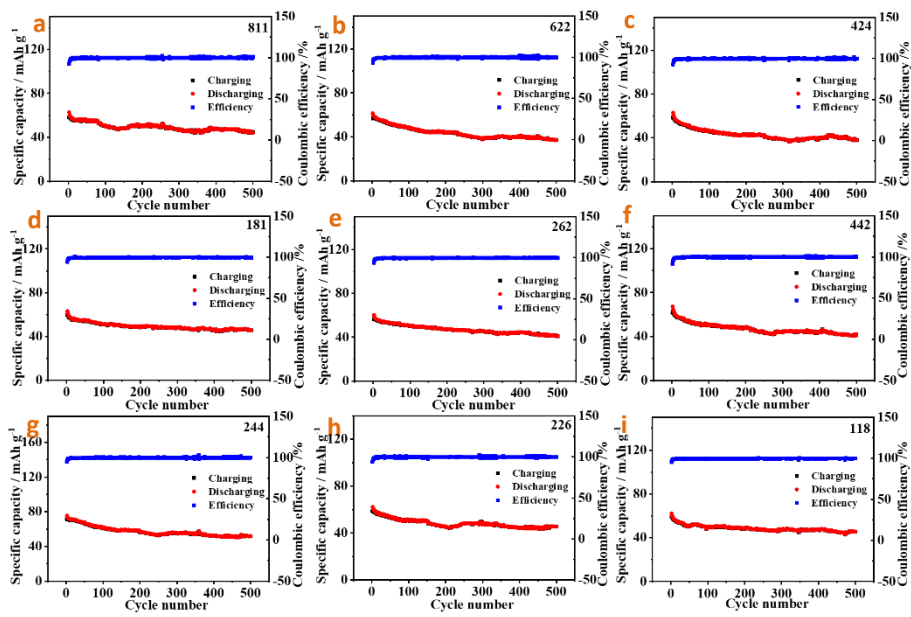

**Fig. S9** Cycling behavior at  $0.5 \text{ A g}^{-1}$  of KMF/rGO (811-118) electrodes.

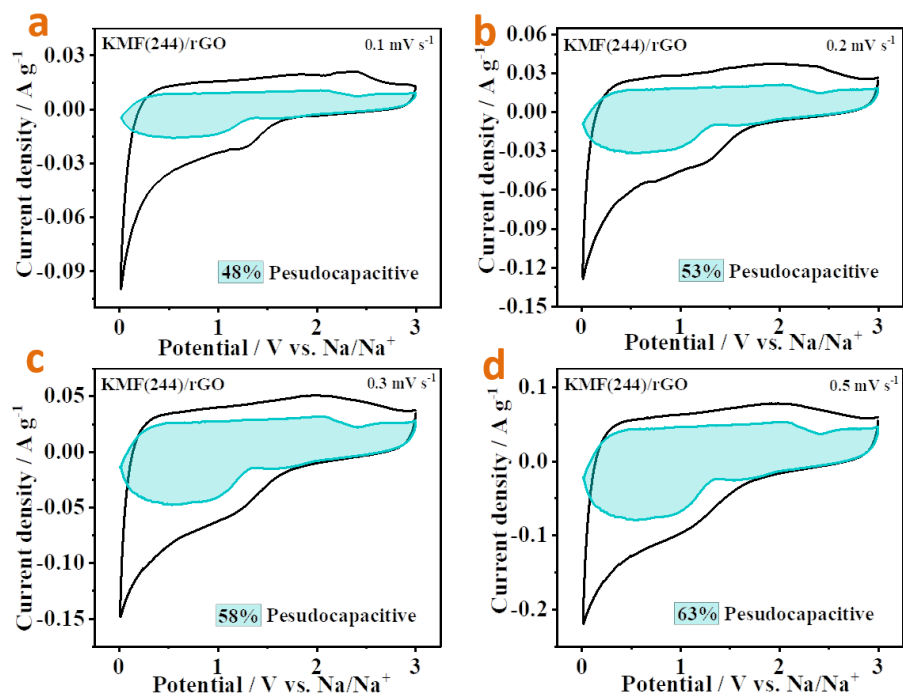

**Fig. S10** Pseudocapacitive and diffusion-controlled contributions to charge storage in the KMF(244)/rGO electrode (the shaded region is the identified pseudocapacitive contribution).

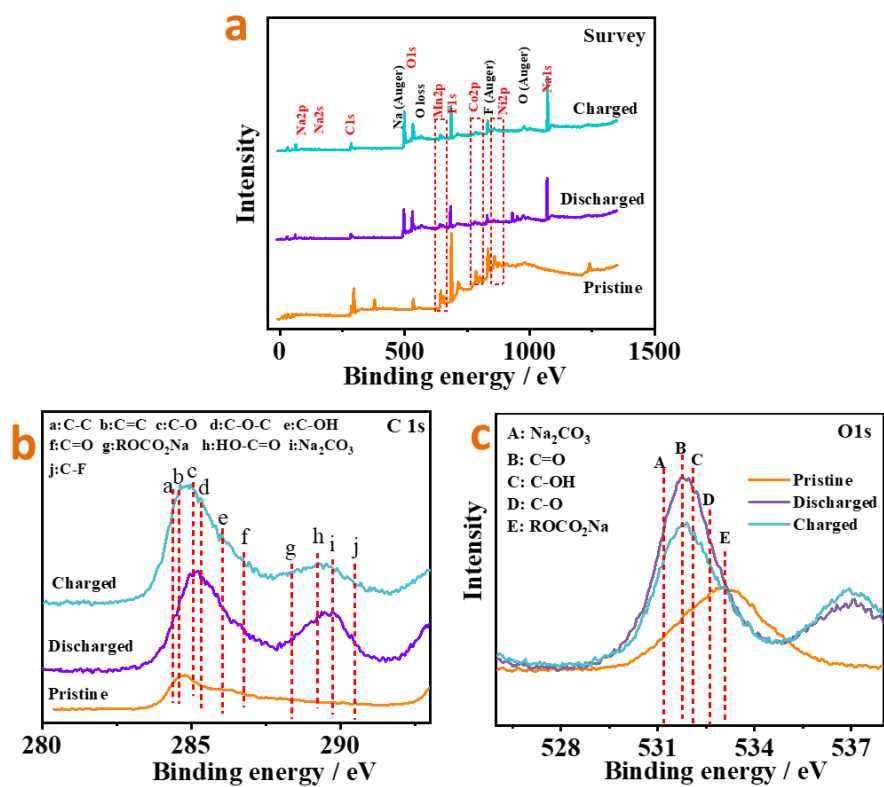

**Fig. S11** Ex-situ XPS for survey scans (a), C1s (b), and O1s (c) in pristine and fully discharged/charged states of the KMF(244)/rGO electrode.



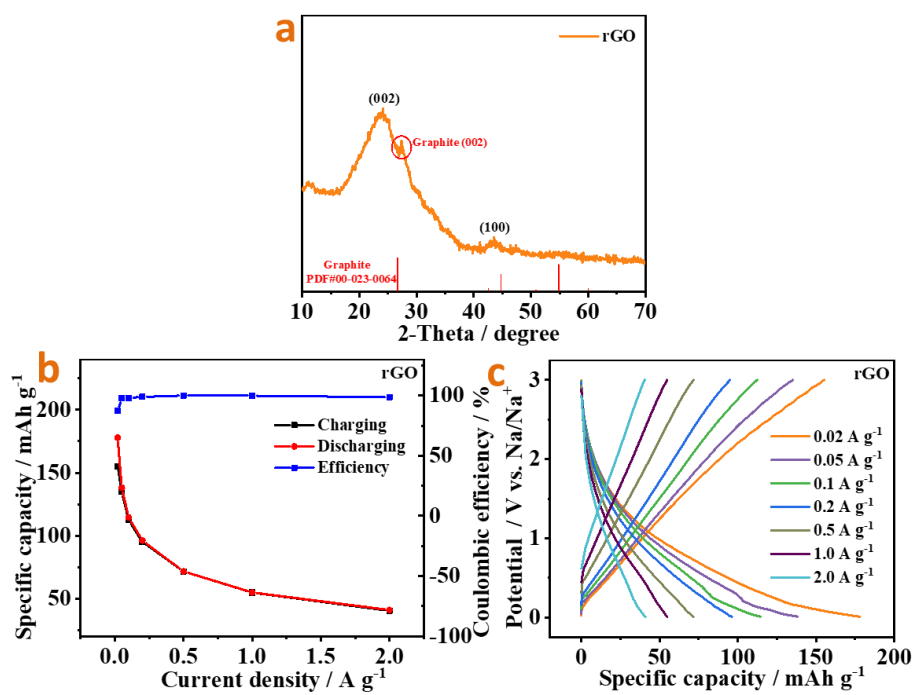

Fig. S12 XRD pattern (a), Specific capacity (b) and GCD curves (c) of rGO.

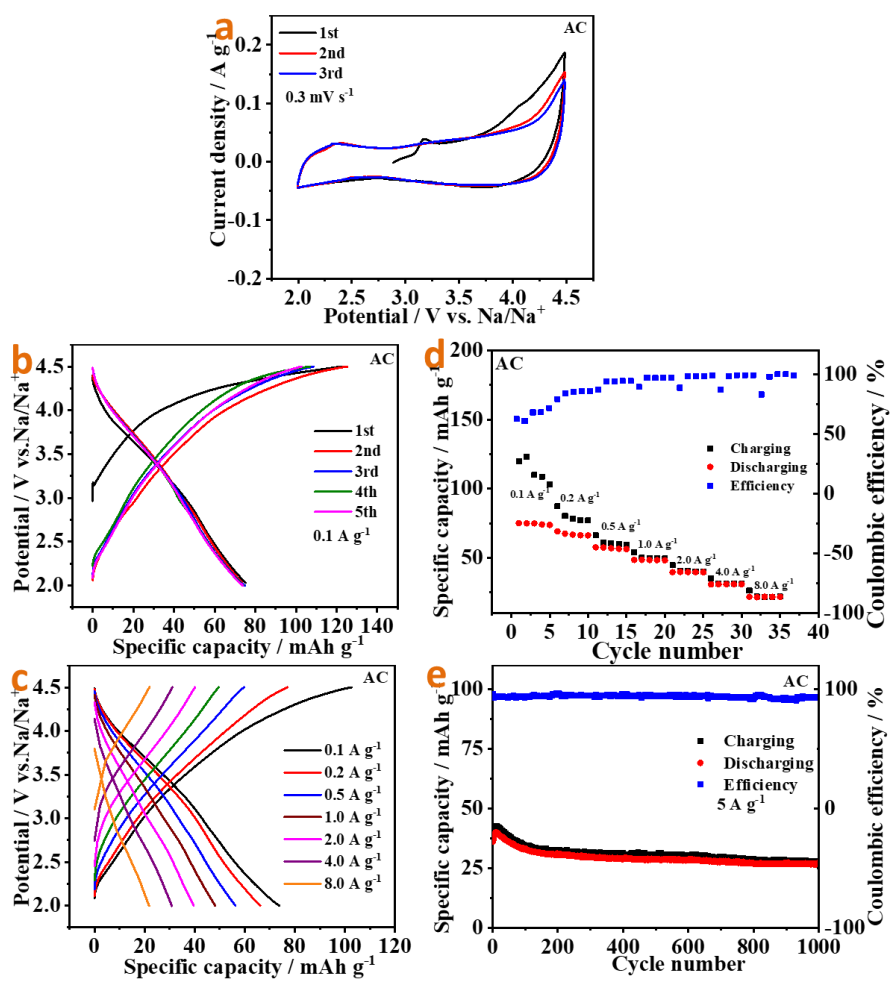

**Fig. S13** Electrochemical performance of the AC electrode: CV plots for the first three cycles at  $0.3 \text{ mV s}^{-1}$  (a); GCD curves at  $0.1 \text{ A g}^{-1}$  (b); GCD curves at  $0.1$ - $8.0 \text{ A g}^{-1}$  (c); rate performance at  $0.1$ - $8.0 \text{ A g}^{-1}$  (d); cycling behavior at  $5 \text{ A g}^{-1}$  (e).

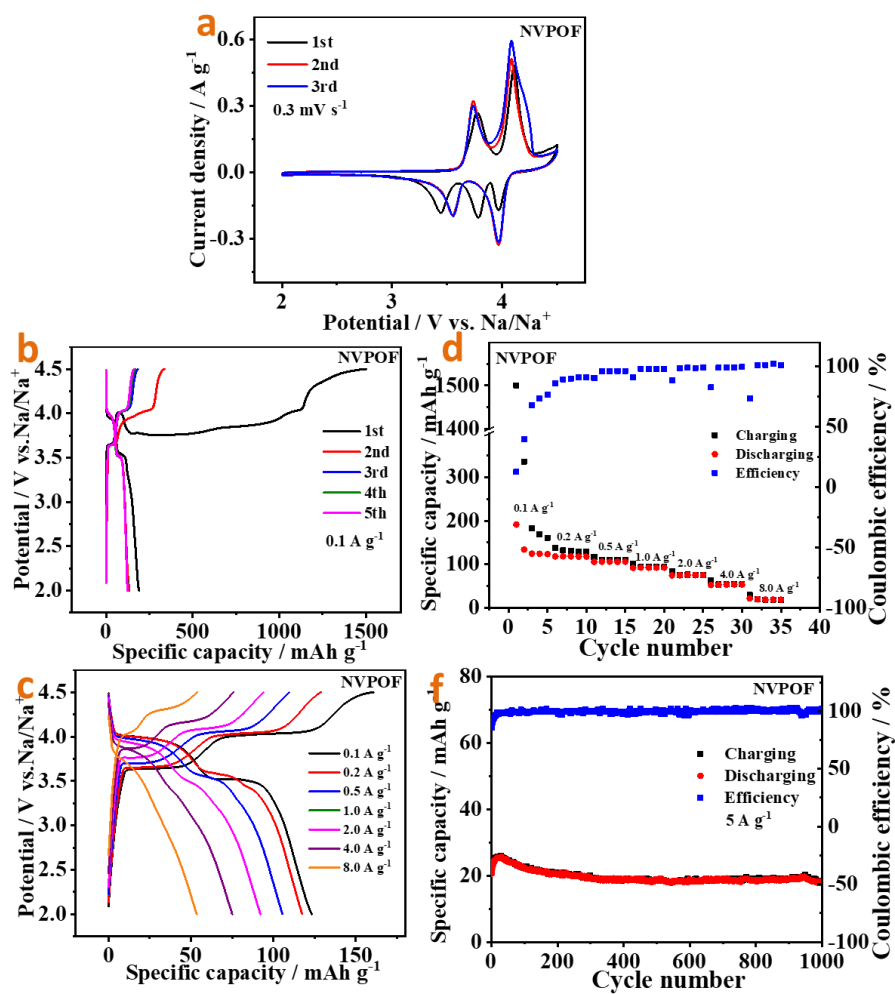

**Fig. S14** Electrochemical performance of the NVPOF electrode: CV plots for the first three cycles at  $0.3 \text{ mV s}^{-1}$  (a); GCD curves at  $0.1 \text{ A g}^{-1}$  (b); GCD curves at  $0.1\text{-}8.0 \text{ A g}^{-1}$  (c); rate performance at  $0.1\text{-}8.0 \text{ A g}^{-1}$  (d); cycling behavior at  $5 \text{ A g}^{-1}$  (e).

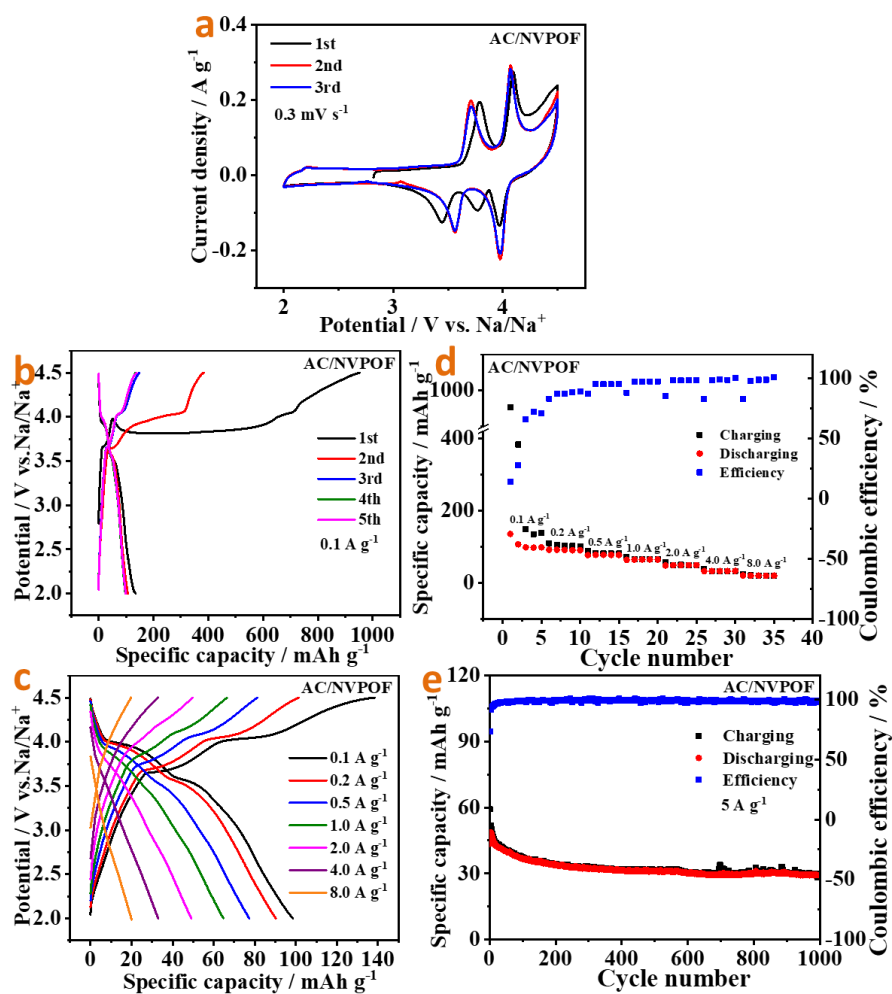

**Fig. S15** Electrochemical performance of the AC/NVPOF electrode: CV plots for the first three cycles at  $0.3 \text{ mV s}^{-1}$  (a); GCD curves at  $0.1 \text{ A g}^{-1}$  (b); GCD curves at  $0.1\text{-}8.0 \text{ A g}^{-1}$  (c); rate performance at  $0.1\text{-}8.0 \text{ A g}^{-1}$  (d); cycling behavior at  $5 \text{ A g}^{-1}$  (e).

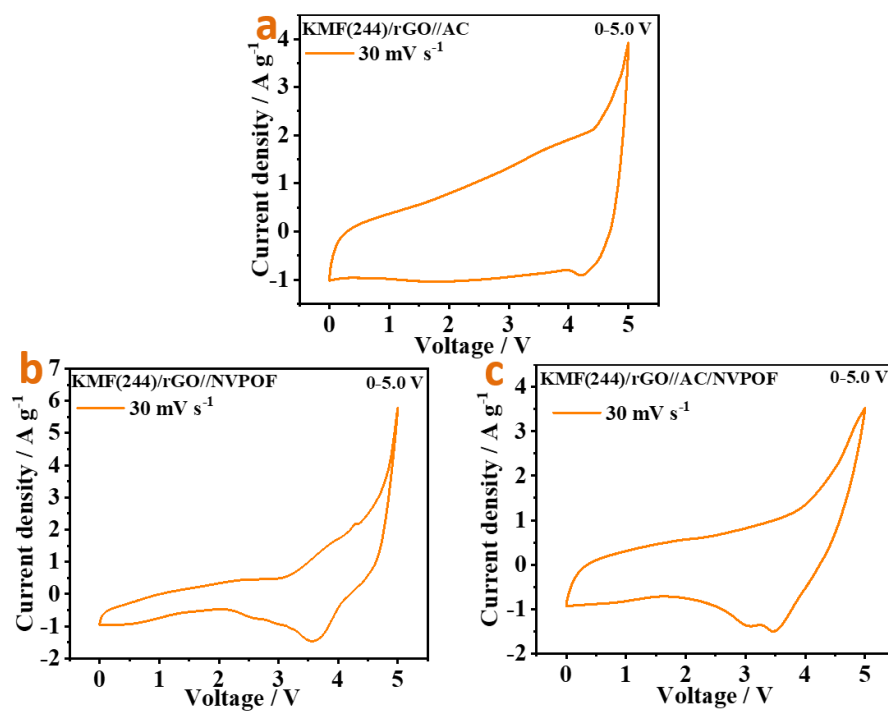

**Fig. S16** Voltage windows of KMF(244)/rGO//AC SICs (a), KMF(244)/rGO//NVPOF SIBs (b), and KMF(244)/rGO//AC/NVPOF SICBs (c).

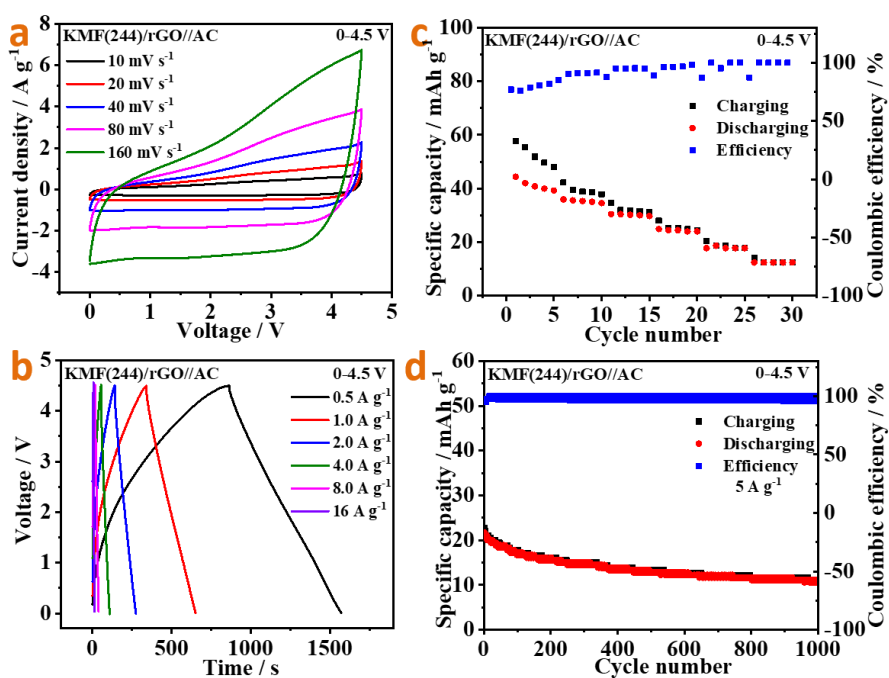

**Fig. S17** CV plots at 10-160 mV s<sup>-1</sup> (a), GCD curves at 0.5-16 A g<sup>-1</sup> (b), rate capability at 0.5-16 A g<sup>-1</sup> (c), and cycling behavior at 5 A g<sup>-1</sup> (d) of the KMF(244)/rGO//AC SICs under 0-4.5 V.

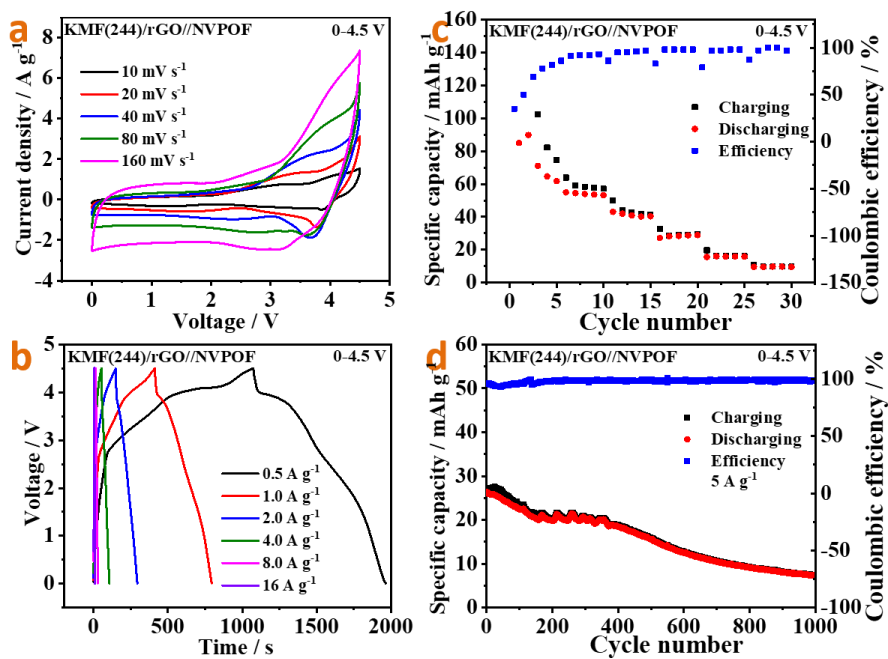

**Fig. S18** CV plots at 10-160  $\text{mV s}^{-1}$  (a), GCD curves at 0.5-16  $\text{A g}^{-1}$  (b), rate capability at 0.5-16  $\text{A g}^{-1}$  (c), and cycling behavior at 5  $\text{A g}^{-1}$  (d) of the KMF(244)/rGO/NVPOF SIBs under 0-4.5 V.

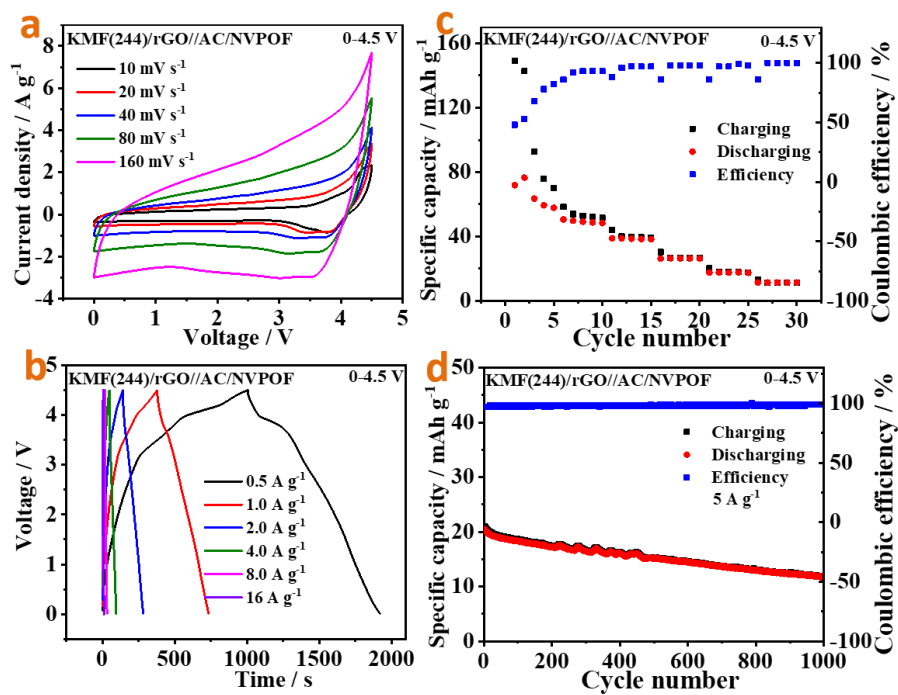

**Fig. S19** CV plots at 10-160  $\text{mV s}^{-1}$  (a), GCD curves at 0.5-16  $\text{A g}^{-1}$  (b), rate capability at 0.5-16  $\text{A g}^{-1}$  (c), and cycling behavior at 5  $\text{A g}^{-1}$  (d) of the KMF(244)/rGO//AC/NVPOF SICBs under 0-4.5 V.



**Table S1** Crystalline parameters for KNiF<sub>3</sub>, KCoF<sub>3</sub>, and KMnF<sub>3</sub>.

| <b>Sample</b>           | <b>ICSD-PDF</b> | <b>Crystal system</b> | <b>Space group</b> | <b>Cell (a×b×c)/Å<sup>3</sup></b> |
|-------------------------|-----------------|-----------------------|--------------------|-----------------------------------|
| <b>KNiF<sub>3</sub></b> | 21-1002         | Cubic                 | <i>Pm-3m</i>       | 4.0127×4.0127×4.0127              |
| <b>KCoF<sub>3</sub></b> | 18-1006         | Cubic                 | <i>Pm-3m</i>       | 4.0708×4.0708×4.0708              |
| <b>KMnF<sub>3</sub></b> | 17-0116         | Cubic                 | <i>Pm-3m</i>       | 4.1890×4.1890×4.1890              |

**Table S2** Charged specific capacity and cycling retention of the KMF/rGO (811-118) electrodes.

| KMF/rGO samples | Specific capacity / mAh g <sup>-1</sup> |                           |                          |                          |                          |                          |                          | Cycle life (500 cycles/0.5 A g <sup>-1</sup> ) |
|-----------------|-----------------------------------------|---------------------------|--------------------------|--------------------------|--------------------------|--------------------------|--------------------------|------------------------------------------------|
|                 | 0.02 (A g <sup>-1</sup> )               | 0.05 (A g <sup>-1</sup> ) | 0.1 (A g <sup>-1</sup> ) | 0.2 (A g <sup>-1</sup> ) | 0.5 (A g <sup>-1</sup> ) | 1.0 (A g <sup>-1</sup> ) | 2.0 (A g <sup>-1</sup> ) |                                                |
| <b>811</b>      | 228                                     | 164                       | 132                      | 105                      | 79                       | 58                       | 42                       | 77%                                            |
| <b>622</b>      | 237                                     | 166                       | 129                      | 103                      | 75                       | 57                       | 41                       | 65%                                            |
| <b>424</b>      | 223                                     | 168                       | 131                      | 104                      | 73                       | 54                       | 37                       | 65%                                            |
| <b>181</b>      | 138                                     | 115                       | 99                       | 85                       | 66                       | 53                       | 41                       | 77%                                            |
| <b>262</b>      | 156                                     | 124                       | 104                      | 87                       | 68                       | 54                       | 41                       | 72%                                            |
| <b>442</b>      | 215                                     | 168                       | 132                      | 103                      | 74                       | 56                       | 40                       | 68%                                            |
| <b>244</b>      | <b>211</b>                              | <b>172</b>                | <b>147</b>               | <b>118</b>               | <b>90</b>                | <b>71</b>                | <b>54</b>                | <b>73%</b>                                     |
| <b>226</b>      | 221                                     | 172                       | 137                      | 110                      | 81                       | 60                       | 42                       | 77%                                            |
| <b>118</b>      | 136                                     | 118                       | 102                      | 86                       | 67                       | 54                       | 41                       | 77%                                            |

**Table S3** Crystalline parameters for the indicated new phases of the fully discharged/charged state XRD patterns.

| <b>Sample</b>            | <b>ICSD-PDF</b> | <b>Crystal system</b> | <b>Space group</b>        | <b>Cell (a×b×c)/Å<sup>3</sup></b> |
|--------------------------|-----------------|-----------------------|---------------------------|-----------------------------------|
| <b>Ni</b>                | 97-064-6091     | Cubic                 | <i>Fm-3m</i>              | 3.5664×3.5664×3.5664              |
| <b>Co</b>                | 97-005-2934     | Cubic                 | <i>Fm-3m</i>              | 3.5688×3.5688×3.5688              |
| <b>Mn</b>                | 97-016-3414     | Cubic                 | <i>P4-32</i>              | 6.2747×6.2747×6.2747              |
| <b>KF</b>                | 01-078-0657     | Cubic                 | <i>Pm-3m</i>              | 3.0600×3.0600×3.0600              |
| <b>NaF</b>               | 01-071-3747     | Cubic                 | <i>Fm-3m</i>              | 4.6500×4.6500×4.6500              |
| <b>NiF<sub>2</sub></b>   | 01-071-4806     | Tetragonal            | <i>P4<sub>2</sub>-mnm</i> | 4.6500×4.6500×3.0800              |
| <b>CoF<sub>2</sub></b>   | 01-070-4977     | Tetragonal            | <i>P4<sub>2</sub>-mnm</i> | 4.6956×4.6956×3.1793              |
| <b>MnF<sub>2</sub></b>   | 01-083-2419     | Tetragonal            | <i>P4<sub>2</sub>-mnm</i> | 4.8413×4.8413×3.3002              |
| <b>NaNiF<sub>3</sub></b> | 04-010-7381     | Orthorhombic          | <i>Pb-nm</i>              | 5.3660×5.5300×7.6950              |
| <b>NaCoF<sub>3</sub></b> | 01-072-0292     | Orthorhombic          | <i>Pn-ma</i>              | 5.6070×7.7900×5.4280              |
| <b>NaMnF<sub>3</sub></b> | 04-002-6582     | Orthorhombic          | <i>Pn-ma</i>              | 5.6660×7.8280×5.4020              |

**Table S4** Charged specific capacity and cycling retention of the Cathode.

| Current Density / A g <sup>-1</sup> | Specific capacity / mAh g <sup>-1</sup> |                          |                          |                          |                          |                          |                          | Cycle life (1000 cycles/5 A g <sup>-1</sup> ) |
|-------------------------------------|-----------------------------------------|--------------------------|--------------------------|--------------------------|--------------------------|--------------------------|--------------------------|-----------------------------------------------|
|                                     | 0.1 (A g <sup>-1</sup> )                | 0.2 (A g <sup>-1</sup> ) | 0.5 (A g <sup>-1</sup> ) | 1.0 (A g <sup>-1</sup> ) | 2.0 (A g <sup>-1</sup> ) | 4.0 (A g <sup>-1</sup> ) | 8.0 (A g <sup>-1</sup> ) |                                               |
| <b>AC</b>                           | 74                                      | 66                       | 56                       | 48                       | 40                       | 31                       | 22                       | 66%                                           |
| <b>NVPOF</b>                        | 123                                     | 117                      | 105                      | 92                       | 75                       | 53                       | 18                       | 69%                                           |
| <b>AC/NVPOF</b>                     | 98                                      | 90                       | 77                       | 65                       | 50                       | 33                       | 20                       | 60%                                           |

**Note:** The cycling retention was evaluated based on the maximum specific capacity values at the 10th, 20th and 4th cycles for AC, NVPOF and AC/NVPOF electrodes respectively.

**Table S5** The design of  $m_+/m_-$  ratios for KMF(244)/rGO//AC SICs, KMF(244)/rGO//NVPOF SIBs, and KMF(244)/rGO//AC/NVPOF SICBs.

| Systems                            | $C_m$ (mAh g <sup>-1</sup> , 0.1 A g <sup>-1</sup> ) |       |          |                    | $m_+/m_-$ |
|------------------------------------|------------------------------------------------------|-------|----------|--------------------|-----------|
|                                    | Positive electrode                                   |       |          | Negative electrode |           |
|                                    | AC                                                   | NVPOF | AC/NVPOF | KMF(244)/rGO       |           |
| KMF(244)/rGO<br>//AC (SICs)        | 74                                                   |       |          | 147                | 2.0/1.0   |
| KMF(244)/rGO<br>//NVPOF (SIBs)     |                                                      | 123   |          | 147                | 1.2/1.0   |
| KMF(244)/rGO<br>//AC/NVPOF (SICBs) |                                                      |       | 98       | 147                | 1.5/1.0   |

**Table S6** Performance summary of the KMF(244)/rGO//AC SICs, KMF(244)/rGO//NVPOF SIBs, and KMF(244)/rGO//AC/NVPOF SICBs in this study.

| Systems                            | Working voltage/V | Energy density/<br>W h kg <sup>-1</sup> | Power density/<br>kW kg <sup>-1</sup> | Cycle life<br>(%/cycles/ A g <sup>-1</sup> ) |
|------------------------------------|-------------------|-----------------------------------------|---------------------------------------|----------------------------------------------|
| KMF(244)/rGO//AC<br>(SICs)         | 0-4.5             | 85.50-74.25                             | 0.43-0.86                             | 82%/100/5 A g <sup>-1</sup>                  |
|                                    |                   | 63.00-51.75                             | 1.69-3.26                             | 72%/200/5 A g <sup>-1</sup>                  |
|                                    |                   | 36.00-24.75                             | 6.17-11.14                            | 57%/500/5 A g <sup>-1</sup>                  |
| KMF(244)/rGO//NVPOF<br>(SIBs)      | 0-4.5             | 163.97-131.00                           | 0.66-1.23                             | 52%/1000/5 A g <sup>-1</sup>                 |
|                                    |                   | 91.70-61.70                             | 2.27-4.19                             | 87%/100/5 A g <sup>-1</sup>                  |
|                                    |                   | 30.30-17.70                             | 7.27-13.27                            | 74%/200/5 A g <sup>-1</sup>                  |
| KMF(244)/rGO//AC/<br>NVPOF (SICBs) | <b>0-4.5</b>      | <b>160.00-113.6</b>                     | <b>0.64-1.17</b>                      | <b>90%/100/5 A g<sup>-1</sup></b>            |
|                                    |                   | <b>83.76-51.54</b>                      | <b>2.20-4.12</b>                      | <b>86%/200/5 A g<sup>-1</sup></b>            |
|                                    |                   | <b>33.00-20.10</b>                      | <b>7.56-15.60</b>                     | <b>76%/500/5 A g<sup>-1</sup></b>            |
|                                    |                   |                                         |                                       | <b>60%/1000/5 A g<sup>-1</sup></b>           |

**Table S7** A comparison for the performance of the KMF(244)/rGO//AC/NVPOF SICBs in this study with some reported SICs and SIBs.

|              | Systems                                                                                                                                           | Voltage window / V | Energy density / W h kg <sup>-1</sup>                           | Power density / kW kg <sup>-1</sup>                       | Cycle life                                                                                                                                        | Refs.            |
|--------------|---------------------------------------------------------------------------------------------------------------------------------------------------|--------------------|-----------------------------------------------------------------|-----------------------------------------------------------|---------------------------------------------------------------------------------------------------------------------------------------------------|------------------|
| <b>SIBs</b>  | Carbon nanofibers//NaFePO <sub>4</sub> @C                                                                                                         | 1.0-4.0            | 168.1(based cathode active mass)                                | /                                                         | 87%/200/0.5 C                                                                                                                                     | [1]              |
|              | Se/HMCS//Na <sub>3</sub> V <sub>2</sub> (PO <sub>4</sub> ) <sub>3</sub> /C                                                                        | 1.2-4.2            | 130                                                             | 0.052                                                     | 60%(about)/100/0.5 A g <sup>-1</sup>                                                                                                              | [2]              |
|              | FeSe/CNS//Na <sub>3</sub> V <sub>2</sub> (PO <sub>4</sub> ) <sub>3</sub>                                                                          | 0.1-2.7            | 86(max)                                                         | 1.58(max)                                                 | 99.9%/140/1 A g <sup>-1</sup>                                                                                                                     | [3]              |
|              | PTCDA/NC/CNT// Na <sub>4</sub> -PTC/CNT                                                                                                           | 0.25-3.0           | 85                                                              | 0.665                                                     | 86%(about)/200/0.2 A g <sup>-1</sup>                                                                                                              | [4]              |
|              | Na <sub>3</sub> V <sub>2</sub> (PO <sub>4</sub> ) <sub>3</sub> :rGO-CNT// Na <sub>3</sub> V <sub>2</sub> (PO <sub>4</sub> ) <sub>3</sub> :rGO-CNT | 1.0-2.2            | 150                                                             | /                                                         | 77%/100/10 C                                                                                                                                      | [5]              |
|              | C//Na <sub>3</sub> V <sub>2</sub> (PO) <sub>2</sub> F <sub>3</sub>                                                                                | 0.8-4.2            | 78                                                              | /                                                         | 98.5%/120/0.2 C                                                                                                                                   | [6]              |
| <b>SICs</b>  | VN//AC                                                                                                                                            | 1.0-4.2            | 78.43-55.25                                                     | 0.26-3.9                                                  | /                                                                                                                                                 | [7]              |
|              | FeVO <sub>4</sub> ·0.6H <sub>2</sub> O//Na <sub>3</sub> (VO) <sub>2</sub> (PO <sub>4</sub> ) <sub>2</sub> F/rGO                                   | 0.9-3.1            | 88-35                                                           | 0.095-7.9                                                 | 70%/1000/1 A g <sup>-1</sup>                                                                                                                      | [8]              |
|              | m-WO <sub>3-x</sub> @NM-rGO//MSP-20                                                                                                               | 1.0-4.3            | 67(max.)                                                        | 21(max.)                                                  | #                                                                                                                                                 | [9]              |
|              | Ti(O,N)//AC                                                                                                                                       | 0.5-4.0            | 46-10.9                                                         | 0.046-11.5                                                | 82.9%/500/1 A g <sup>-1</sup>                                                                                                                     | [10]             |
|              | V <sub>2</sub> O <sub>5</sub> /CNT//AC                                                                                                            | 0-2.8              | 38-7.5                                                          | 0.14-5                                                    | 80%/900/60 C                                                                                                                                      | [11]             |
| <b>SICBs</b> | <b>KMF(244)/rGO//AC/NVPOF (SICBs)</b>                                                                                                             | <b>0-4.5</b>       | <b>160.00-113.6</b><br><b>83.76-51.54</b><br><b>33.00-20.10</b> | <b>0.64-1.17</b><br><b>2.20-4.12</b><br><b>7.56-15.60</b> | <b>90%/100/5 A g<sup>-1</sup></b><br><b>86%/200/5 A g<sup>-1</sup></b><br><b>76%/500/5 A g<sup>-1</sup></b><br><b>60%/1000/5 A g<sup>-1</sup></b> | <b>This work</b> |

**Table S8** Chemicals, reagents, and materials used in the study.

| <b>Chemicals, Reagents and Materials</b>                                             | <b>Type</b>              | <b>Company</b>                   | <b>Characteristics</b>                                                                                            |
|--------------------------------------------------------------------------------------|--------------------------|----------------------------------|-------------------------------------------------------------------------------------------------------------------|
| <b>NiCl<sub>2</sub>·6H<sub>2</sub>O</b>                                              | AR                       | SinoPharm                        | purity≥98.0%                                                                                                      |
| <b>CoCl<sub>2</sub>·6H<sub>2</sub>O</b>                                              | AR                       | SinoPharm                        | purity≥99.0%                                                                                                      |
| <b>MnCl<sub>2</sub>·4H<sub>2</sub>O</b>                                              | AR                       | SinoPharm                        | purity≥99.0%                                                                                                      |
| <b>KF·2H<sub>2</sub>O</b>                                                            | AR                       | SinoPharm                        | purity≥99.0%                                                                                                      |
| <b>PVP-K30</b>                                                                       | GR                       | SinoPharm                        | /                                                                                                                 |
| <b>EG</b>                                                                            | AR                       | SinoPharm                        | purity≥99.0%                                                                                                      |
| <b>Graphene oxide (GO)</b>                                                           | /                        | ZhengZhou<br>JingHong New Energy | 3-10 floors<br>Conductivity: 2.0*10 <sup>5</sup> S m <sup>-1</sup><br>SSA: 150~200 m <sup>2</sup> g <sup>-1</sup> |
| <b>Activated carbon (AC)</b>                                                         | YEC 8b                   | FuZhou YiHuan                    | D50: ~10 μm; Density: 0.4 g cm <sup>-3</sup> ;<br>SSA:2000~2500 m <sup>2</sup> g <sup>-1</sup>                    |
| <b>Na<sub>3</sub>V<sub>2</sub>(PO<sub>4</sub>)<sub>2</sub>O<sub>2</sub>F (NVPOF)</b> | /                        | NEWARE                           | purity≥99.0%                                                                                                      |
| <b>Superconductive carbon black</b>                                                  | Battery grade            | JH                               | /                                                                                                                 |
| <b>NMP</b>                                                                           | AR                       | Kermel                           | purity≥99.0%                                                                                                      |
| <b>PVDF</b>                                                                          | Battery grade            | JH                               | /                                                                                                                 |
| <b>Electrolytes</b>                                                                  | Na206-181224             | MJS                              | 0.85 M NaPF <sub>6</sub> /EC:DEC:EMC (1:1:1) / 5% FEC                                                             |
| <b>Na plate (Homemade)</b>                                                           | Battery grade            | /                                | /                                                                                                                 |
| <b>Cu foil</b>                                                                       | 200*0.015                | GuangZhou<br>JiaYuan             | Total thickness: 15 μm; weight: 87 g m <sup>-2</sup>                                                              |
| <b>Carbon coated-Al foil</b>                                                         | 222*0.015                | GuagZhou<br>NaNuo                | Total thickness: 17 μm; Strength: 192 Mpa                                                                         |
| <b>Glass microfiber filters</b>                                                      | GF/D 2.7 μm;<br>1823-025 | Whatman                          | Diameter: 25 mm; Thickness: 675 μm;<br>weight: 121 g m <sup>-2</sup>                                              |
| <b>Cell components</b>                                                               | CR-2032                  | ShenZhen<br>TianChenHe           | /                                                                                                                 |



**Table S9** The usage amounts of reagents of the KMF/rGO (811-118) samples.

| Samples    | Reagent                                        |                                                |                                                |                                |                |             |            |
|------------|------------------------------------------------|------------------------------------------------|------------------------------------------------|--------------------------------|----------------|-------------|------------|
|            | NiCl <sub>2</sub> ·6H <sub>2</sub> O<br>(mmol) | CoCl <sub>2</sub> ·6H <sub>2</sub> O<br>(mmol) | MnCl <sub>2</sub> ·4H <sub>2</sub> O<br>(mmol) | KF·2H <sub>2</sub> O<br>(mmol) | PVP-K30<br>(g) | GO<br>(g)   | EG<br>(ml) |
| 811        | 1.6                                            | 0.2                                            | 0.2                                            | 5                              | 0.2            | 0.06        | 32         |
| 622        | 1.2                                            | 0.4                                            | 0.4                                            | 5                              | 0.2            | 0.06        | 32         |
| 424        | 0.8                                            | 0.4                                            | 0.8                                            | 5                              | 0.2            | 0.06        | 32         |
| 181        | 0.2                                            | 1.6                                            | 0.2                                            | 5                              | 0.2            | 0.06        | 32         |
| 262        | 0.4                                            | 1.2                                            | 0.4                                            | 5                              | 0.2            | 0.06        | 32         |
| 442        | 0.8                                            | 0.8                                            | 0.4                                            | 5                              | 0.2            | 0.06        | 32         |
| <b>244</b> | <b>0.4</b>                                     | <b>0.8</b>                                     | <b>0.8</b>                                     | <b>5</b>                       | <b>0.2</b>     | <b>0.06</b> | <b>32</b>  |
| 226        | 0.4                                            | 0.4                                            | 1.2                                            | 5                              | 0.2            | 0.06        | 32         |
| 118        | 0.2                                            | 0.2                                            | 1.6                                            | 5                              | 0.2            | 0.06        | 32         |

## References

- [1] Y. C. Liu, N. Zhang, F. F. Wang, X. B. Liu, L. F. Jiao, L.-Z. Fan, Approaching the Downsizing Limit of Maricite NaFePO<sub>4</sub> toward High-Performance Cathode for Sodium-Ion Batteries, *Adv. Funct. Mater.* 28 (2018) 1801917.
- [2] P. Xue, Y. J. Zhai, N. N. Wang, Y. H. Zhang, Z. X. Lu, Y. L. Liu, Z. C. Bai, B. K. Han, G. F. Zou, S. X. Dou, Selenium@Hollow mesoporous carbon composites for high-rate and long-cycling lithium/sodium-ion batteries, *Chem. Eng. J.* 392 (2020) 123676.
- [3] Z. Xiong, D. D. Sun, X. L. Jia, J. S. Zhou, Core/shell FeSe/carbon nanosheet-assembled microflowers with ultrahigh coulombic-efficiency and rate performance as nonpresodiate anode for sodium-ion battery, *Carbon* 166 (2020) 339-349.
- [4] G. Y. Zhou, L. L. Mo, C. Y. Zhou, Y. Wu, F. L. Lai, Y. Lv, J. M. Ma, Y.-E. Miao, T. X. Liu, Ultra-strong capillarity of bioinspired micro/nanotunnels in organic cathodes enabled high-performance all-organic sodium-ion full batteries, *Chem. Eng. J.* (2020) 127597.
- [5] C. B. Zhu, P. Kopold, P. A. van Aken, J. Maier, Y. Yu, High Power–High Energy Sodium Battery Based on Threefold Interpenetrating Network, *Adv. Mater.* 28 (2016) 2409-2416.
- [6] A. Ponrouch, R. Dedryvère, D. Monti, A. E. Demet, J. M. Ateba Mba, L. Croguennec, C. Masquelier, P. Johansson, M. R. Palacín, Towards high energy density sodium ion batteries through electrolyte optimization, *Energy Environ. Sci.* 6 (2013) 2361-2369.
- [7] S. Q. Wei, C. D. Wang, S. M. Chen, P. J. Zhang, K. F. Zhu, C. Q. Wu, P. Song, W. Wen, L. Song, Dial the Mechanism Switch of VN from Conversion to Intercalation toward Long Cycling Sodium-Ion Battery, *Adv. Energy Mater.* 10 (2020) 1903712.
- [8] J. Dong, Y. He, Y. L. Jiang, S. S. Tan, Q. L. Wei, F. Y. Xiong, Z. L. Chu, Q. Y. An, L. Q. Mai, Intercalation pseudocapacitance of FeVO<sub>4</sub>·nH<sub>2</sub>O nanowires anode for high-energy and high-power sodium-ion capacitor, *Nano Energy* 73 (2020) 104838.
- [9] M. S. Kim, E. Lim, S. Kim, C. Jo, J. Chun, J. Lee, General Synthesis of N-Doped Macroporous Graphene-Encapsulated Mesoporous Metal Oxides and Their Application as New Anode Materials for Sodium-Ion Hybrid Supercapacitors, *Adv. Funct. Mater.* 27 (2017) 1603921.
- [10] J. Dong, Y. L. Jiang, Q. D. Li, Q. L. Wei, W. Yang, S. S. Tan, X. Xu, Q. Y. An, L. Q. Mai, Pseudocapacitive titanium oxynitride mesoporous nanowires with iso-oriented nanocrystals for ultrahigh-rate sodium ion hybrid capacitors, *J. Mater. Chem. A* 5 (2017) 10827-10835.
- [11] Z. Chen, V. Augustyn, X. L. Jia, Q. F. Xiao, B. Dunn, Y. F. Lu, High-Performance Sodium-Ion Pseudocapacitors Based on Hierarchically Porous Nanowire Composites, *ACS Nano* 6 (2012) 4319-4327.
